# Supplementary material for: A self-healable metallohydrogel for drug encapsulations and drug release
Source: Royal Society of Chemistry journal article supplement (doi:10.1039/d3ra00930k), 2023-01-01
Supplement: d3ra00930k1.pdf [file d3ra00930k1.pdf]

## Supporting information

### **A Self-Healable Metallohydrogel for Drug Encapsulations and Drug Release**

Mita Dutta<sup>a</sup>, Shreya Banerjee<sup>b</sup>, Mahitosh Mandal<sup>b</sup> and Manish Bhattacharjee<sup>\*,a</sup>

<sup>a</sup>Department of Chemistry, Indian Institute of Technology, Kharagpur 721302, India

<sup>b</sup>School of Medical Science and Technology, Indian Institute of Technology Kharagpur 721302, India

Email: [mxb@iitkgp.ac.in](mailto:mxb@iitkgp.ac.in)

#### **Table of the Contents**

| <b>Content</b>                                                                                                                  | <b>Page no</b> |
|---------------------------------------------------------------------------------------------------------------------------------|----------------|
| <b>Figure S1 Inverted vial picture of the metallohydrogel</b>                                                                   | <b>S2</b>      |
| <b>Figure S2 Stimuli responsive nature of the metallohydrogel</b>                                                               | <b>S2</b>      |
| <b>Figure S3 Optical images of the MOGs</b>                                                                                     | <b>S3</b>      |
| <b>Figure S4 MALDI-TOF Spectrum of MOG</b>                                                                                      | <b>S4</b>      |
| <b>Figure S5 MALDI-TOF analysis of the MOG</b>                                                                                  | <b>S5</b>      |
| <b>Figure S6 PXRD of xerogel</b>                                                                                                | <b>S6</b>      |
| <b>Figure S7 Amplitude sweep experiments of (a) MOG (b) MOG_IND (c)MOG_GEM</b>                                                  | <b>S7</b>      |
| <b>Figure S8 Frequency sweep experiment of the MOG at strain 2% strain</b>                                                      | <b>S8</b>      |
| <b>Figure S9 (a) Frequency sweep and (b) amplitude sweep of healed MOG</b>                                                      | <b>S9</b>      |
| <b>Figure S10 (a) Dye doped and undoped gel block (b) bridge constructed by alternative undoped and dye doped gel block</b>     | <b>S9</b>      |
| <b>Figure S11 Drug release profiles, at pH 7.4 and 5.8, of indomethacin sodium salts from the MOG_IND</b>                       | <b>S10</b>     |
| <b>Figure S12 Cytotoxicity study in L929 cell by MTT assay after 24 h incubation at 37 °C of MOG_GEM, GEM and MOG</b>           | <b>S11</b>     |
| <b>Figure S13 anti-inflammatory study in Raw 264.7 cell by MTT assay after 24 h incubation at 37 °C of MOG_IND, IND and MOG</b> | <b>S12</b>     |
| <b>Figure S14 Live dead assay of MDA-MB-468 cell after 48 hours' treatment with MOG_GEM, GEM, MOG</b>                           | <b>S12</b>     |
| <b>Table S1. EDAX analysis of the MOG</b>                                                                                       | <b>S13</b>     |

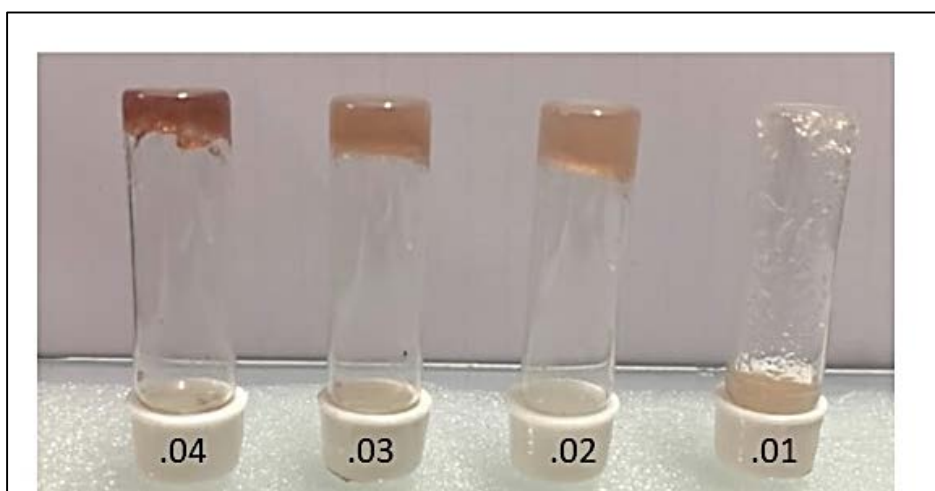

**Figure S1:** Optical images of inverted vial metallogel indication variation of concentration for the formation of stable gel.

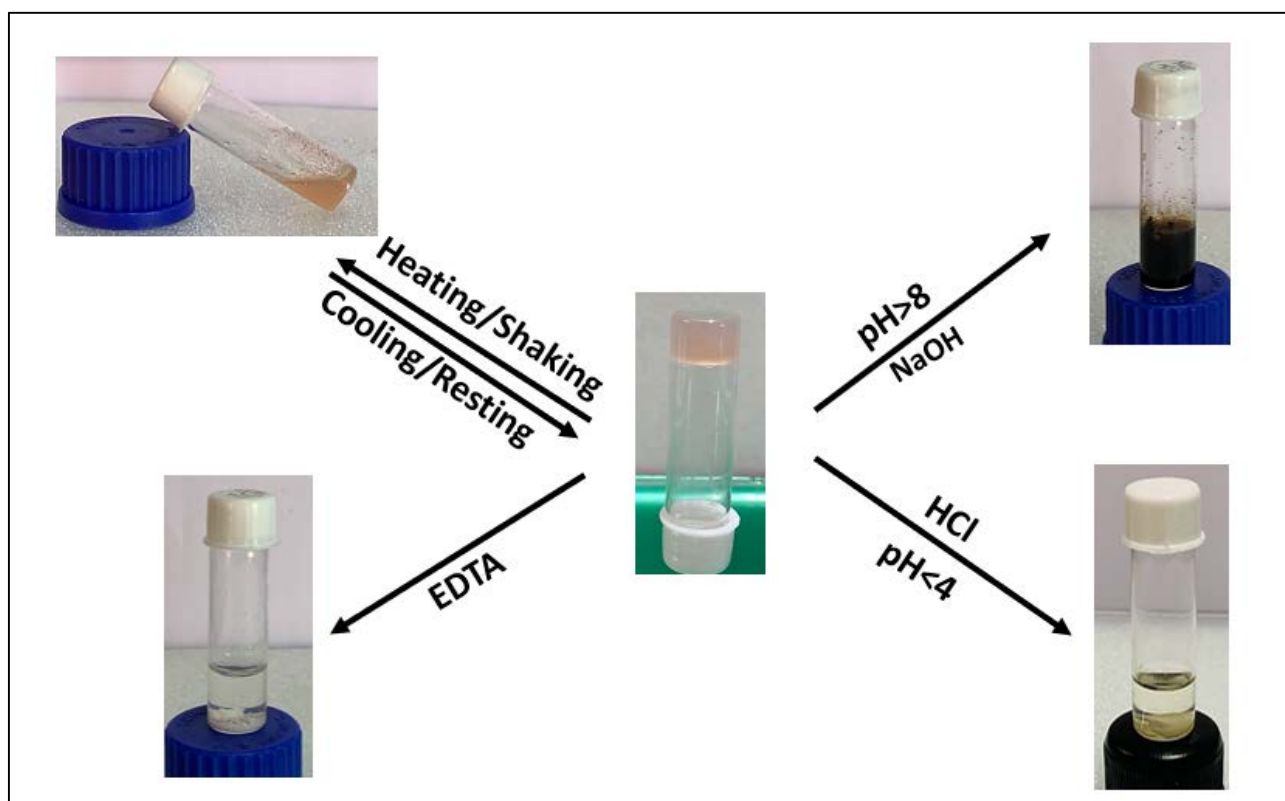

**Figure S2:** Diverse stimuli-responsive nature of the metallogel

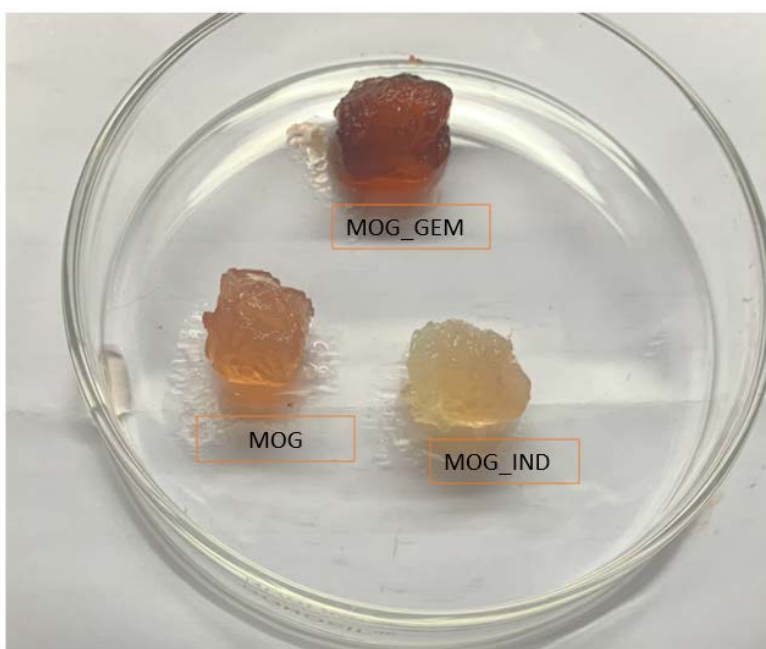

**Figure S3** Optical image of the MOG and drug encapsulated MOGs

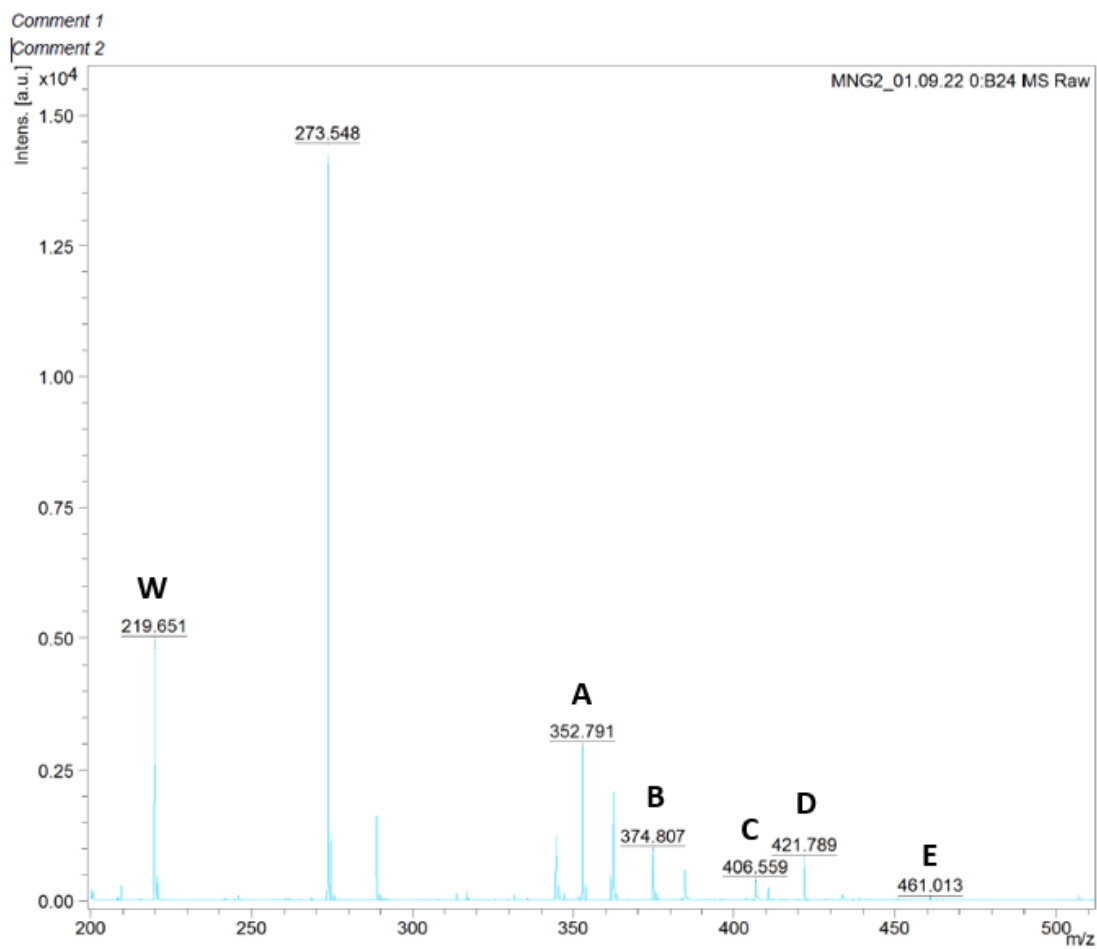

**Figure S4** MALDI-TOF spectra of MOG

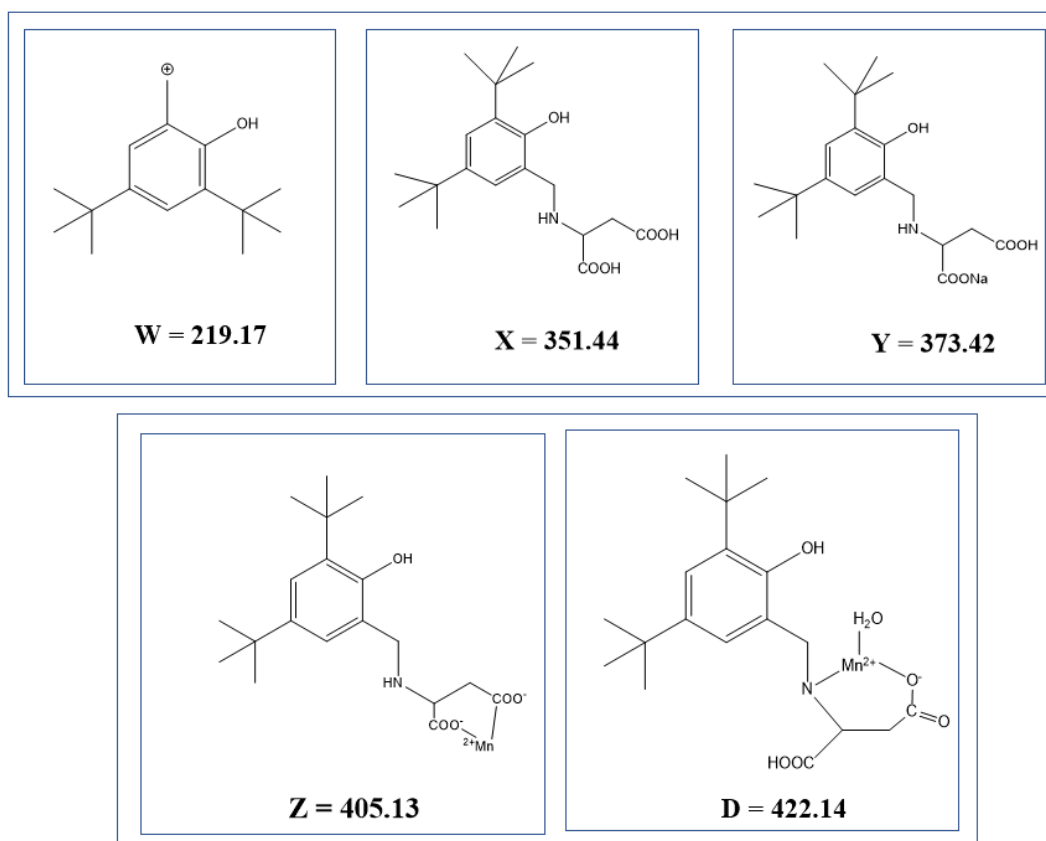

(a)

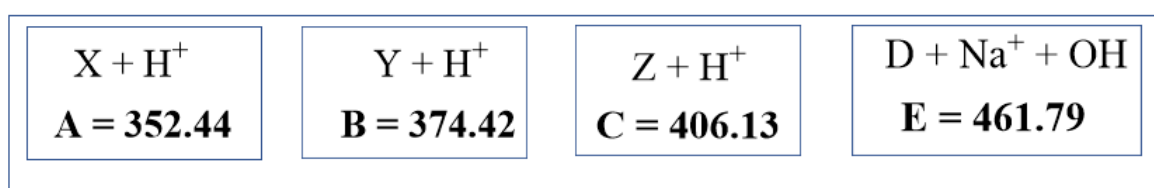

(b)

**Figure S5** (a) and (b) Index peak analysis of the MALDI-TOF spectra of MOG ((Positive ion detection mode)\*

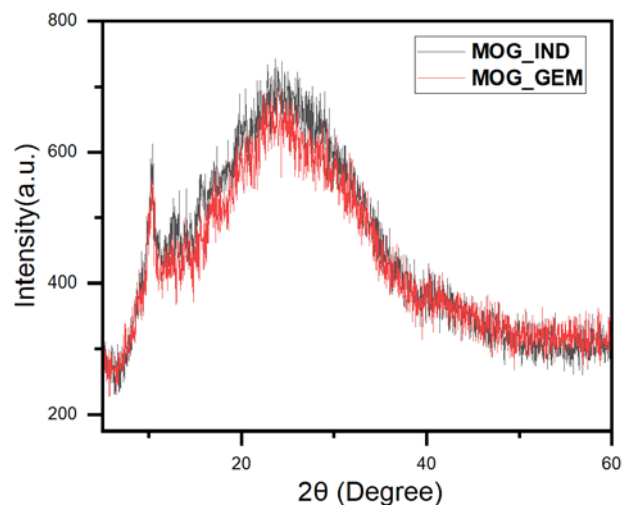

**Figure S6** Powder X-ray diffraction pattern of the drug encapsulated metallogels.

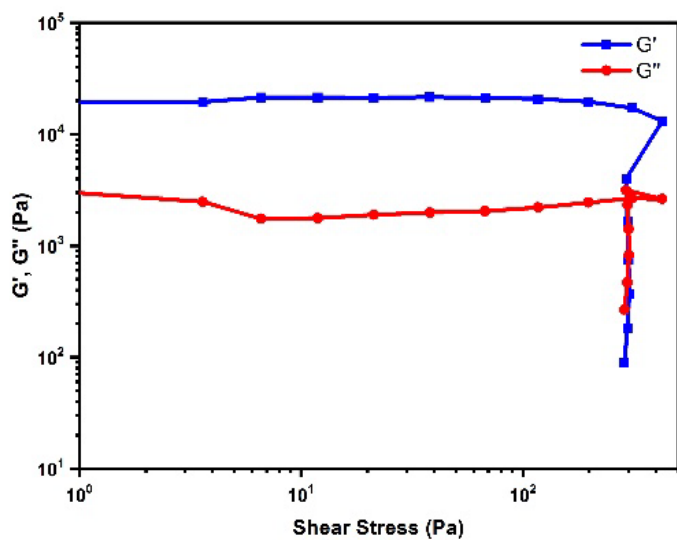

(a)

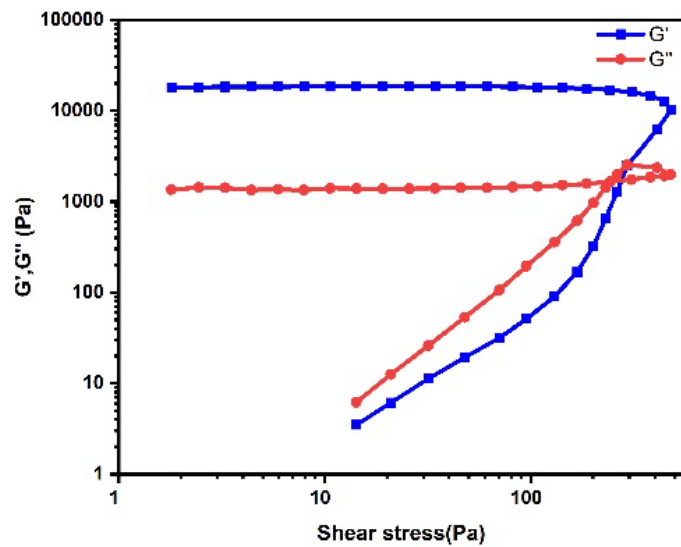

(b)

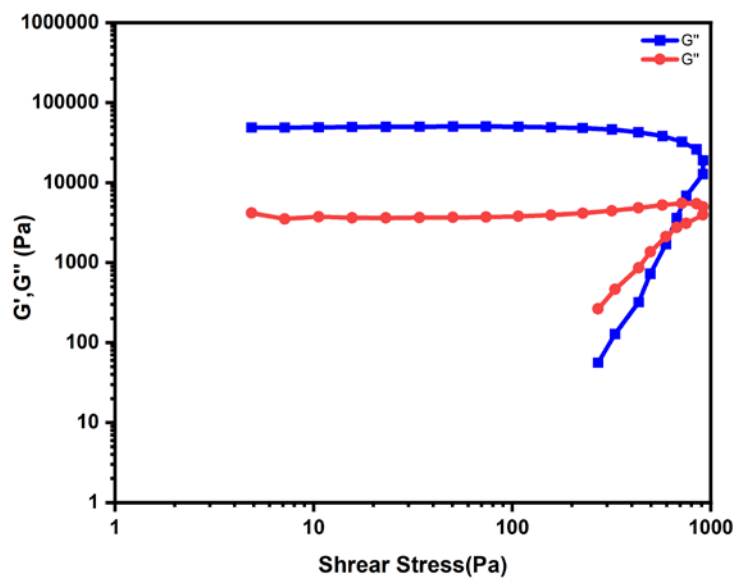

(c)

**Figure S7** Amplitude sweep experiments of (a) MOG (b) MOG\_IND (c)MOG\_GEM

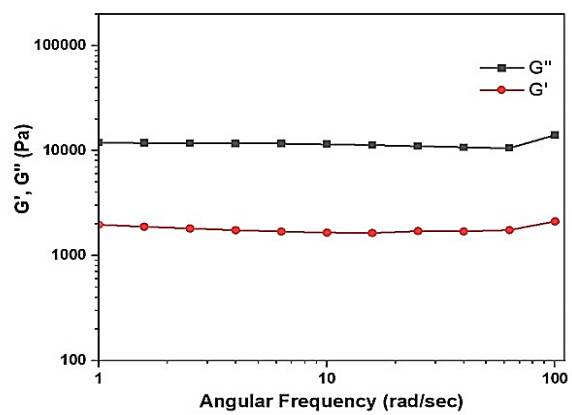

**Figure S8** Frequency sweep experiment of the MOG at stain 2% strain



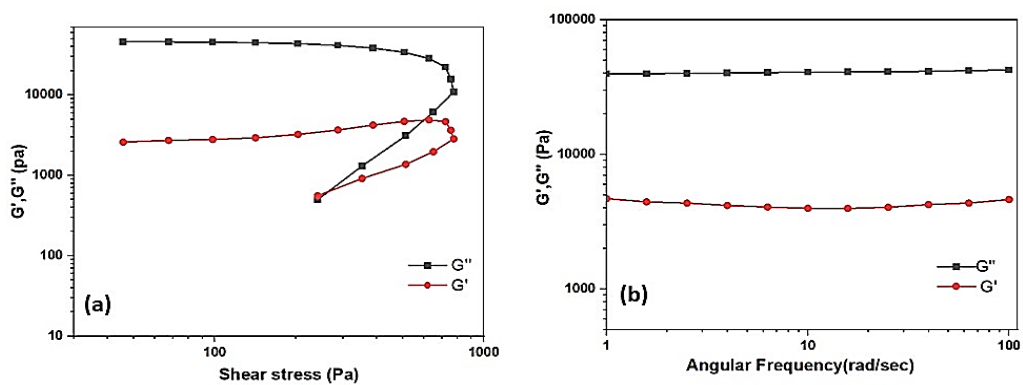

**Figure S9** (a) Frequency sweep and (b) amplitude sweep of healed MOG

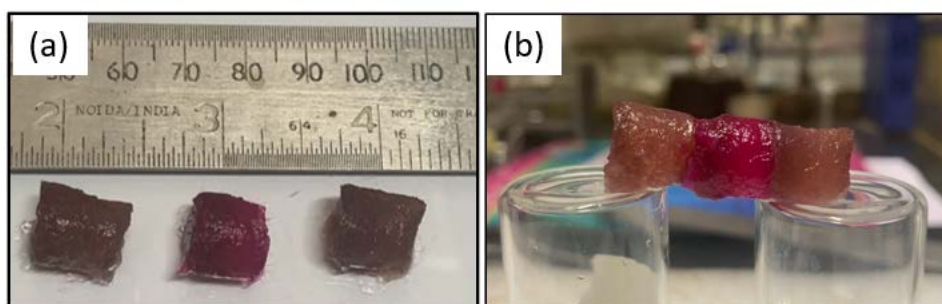

**Figure S10** (a) Dye doped and undoped gel block (b) bridge constructed by alternative undoped and dye doped gel block.

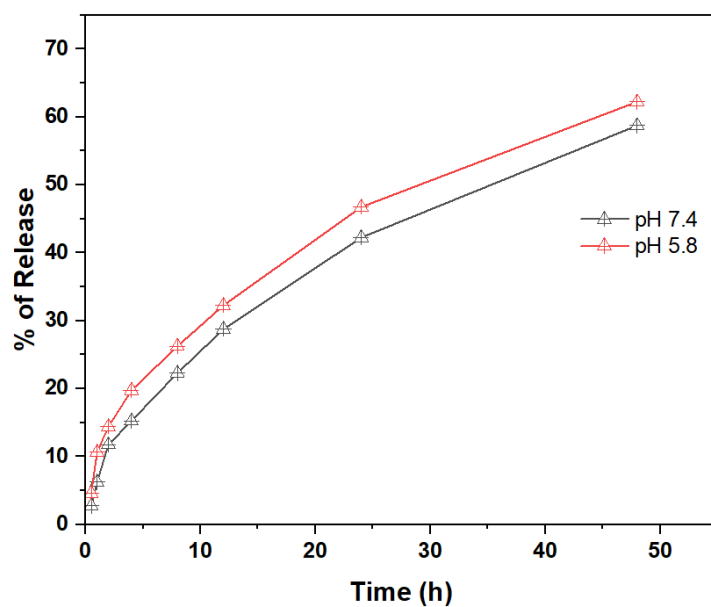

**Figure S11** Drug release profiles, at pH 7.4 and 5.8, of indomethacin sodium salts from the MOG\_IND

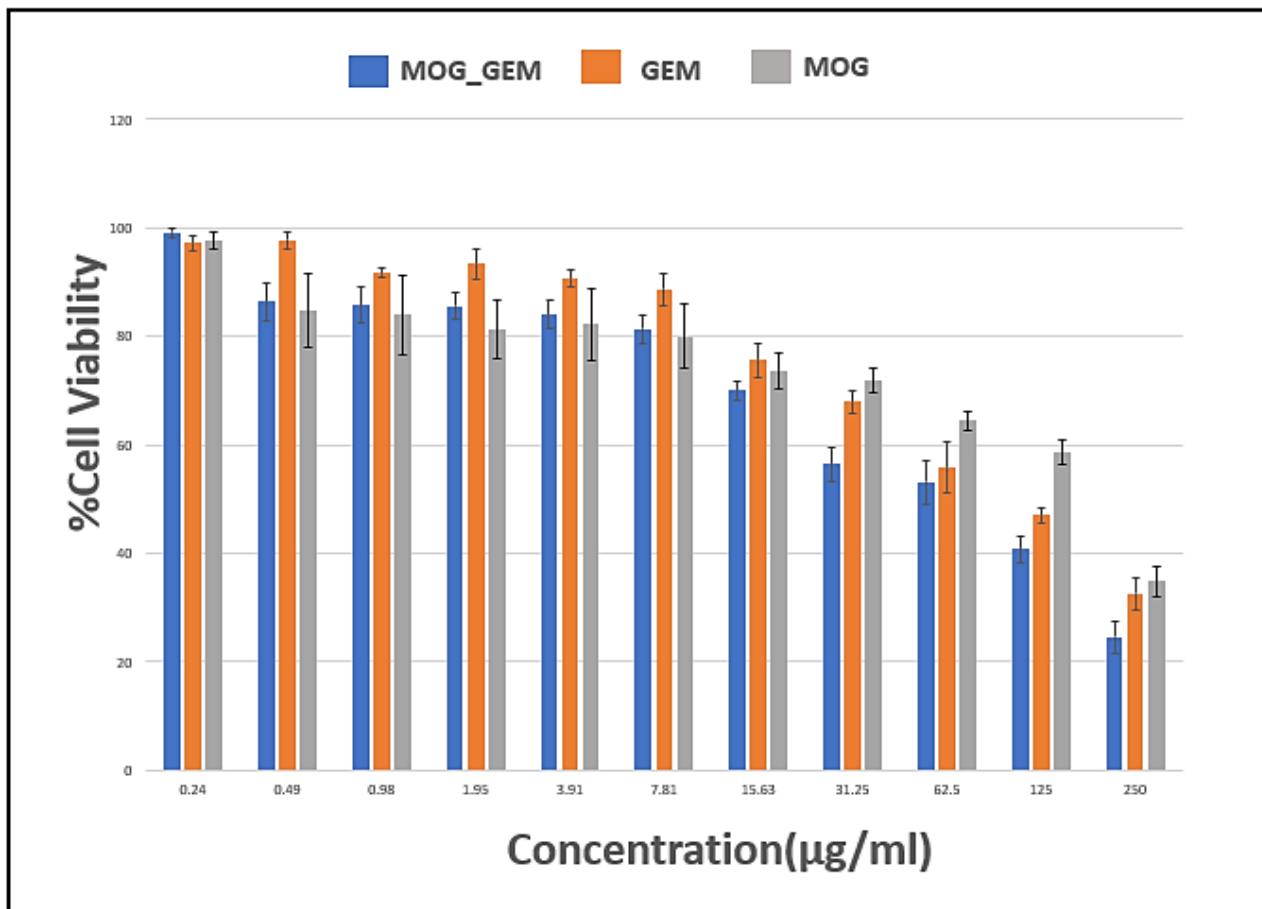

**Figure S12** Cytotoxicity study in L929 cell by MTT assay after 24 h incubation at 37 °C of MOG\_GEM, GEM and MOG

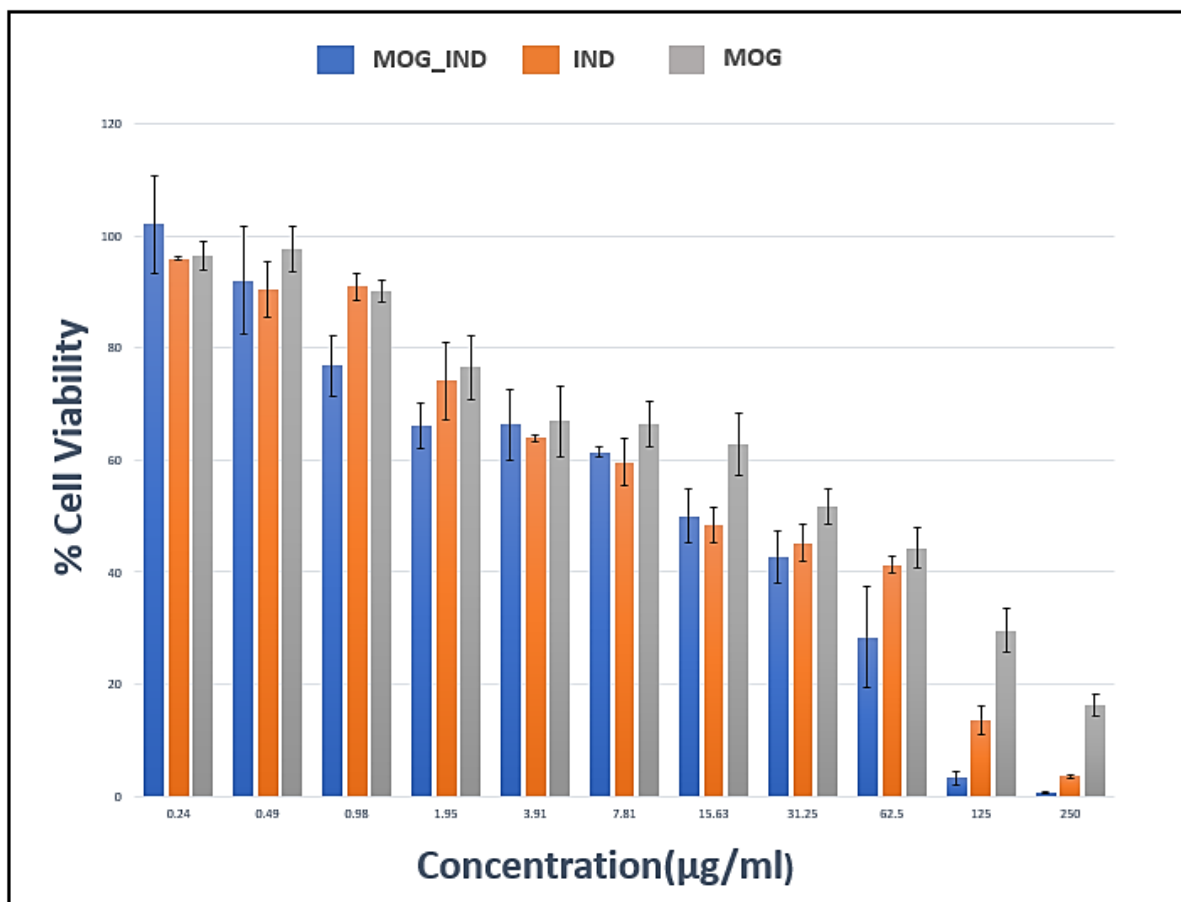

**Figure S13** anti-inflammatory study in Raw 264.7 cell by MTT assay after 24 h incubation at 37 °C of MOG\_IND, IND and MOG

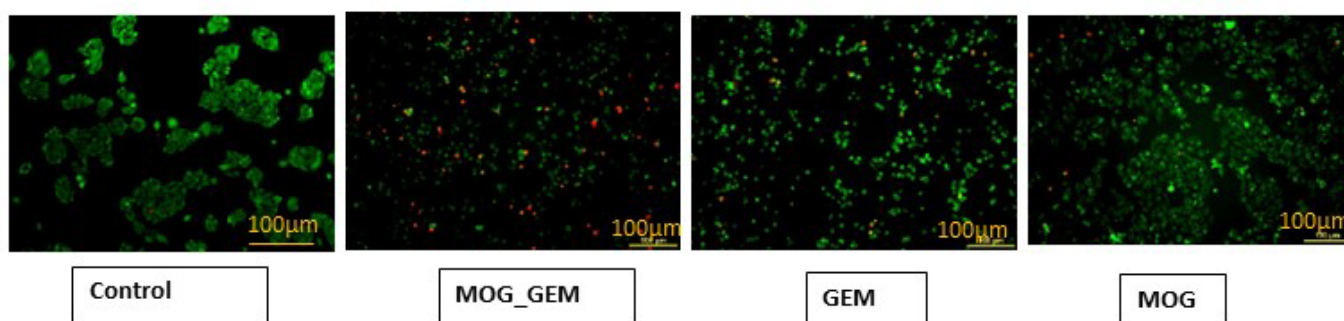

**Figure S14** Live dead assay of MDA-MB-468 cell after 48 hours' treatment with MOG\_GEM, GEM, MOG

**Table S1. EDAX analysis of the MOG**

| Element | Weight % | Atomic % | Net Int. | Error % | Kratio | Z      | A      | F      |
|---------|----------|----------|----------|---------|--------|--------|--------|--------|
| C K     | 25.88    | 34.01    | 156.26   | 7.38    | 0.1703 | 1.0710 | 0.6146 | 1.0000 |
| N K     | 25.16    | 28.35    | 67.98    | 12.53   | 0.0859 | 1.0419 | 0.3279 | 1.0000 |
| O K     | 33.71    | 33.25    | 165.93   | 10.50   | 0.1062 | 1.0167 | 0.3100 | 1.0000 |
| MnK     | 15.25    | 4.38     | 33.79    | 18.39   | 0.1159 | 0.7338 | 1.0092 | 1.0263 |

**\*Maximum deviation of assigned peaks for S6 from experimented value is  $\pm 0.50$  Peak at  $m/z=273.49$  appeared due to the presence of DHB matrix)**
